# Supplementary material
Source: PubMed Central journal article supplement (PMC3047400)
Supplement: NIHMS265336-supplement-a.pdf [file NIHMS265336-supplement-a.pdf]

1  
2  
3  
4  
5  
6  
7  
8  
9  
10  
11  
12  
13  
14  
15  
16  
17  
18  
19  
20  
21  
22  
23  
24  
25  
26  
27  
28  
29  
30  
31  
32  
33  
34  
35  
36  
37  
38  
39  
40  
41  
42  
43  
44  
45  
46  
47  
48  
49  
50  
51  
52  
53  
54  
55  
56  
57  
58  
59  
60

## TABLES

**Supplemental Table S1.** Sequence of primers for real time PCR

| Gene      | Forward primer                             | Reverse primer                          |
|-----------|--------------------------------------------|-----------------------------------------|
| S25       | 5'-GTG GTC CAC ACT ACT CTC TGA GTT TC-3'   | 5'- GAC TTT CCG GCA TCC TTC TTC-3'      |
| MafA cds  | 5'-CTT CAG CAA GGA GGA GGT CAT C-3'        | 5'- GCG TAG CCG CGG TTC TT-3            |
| MafA UTR  | 5'- GTC TTC AGG GTC GCC GTC TAG-3          | 5'- GAG GTT GGG ACG CAG AAC TG-3        |
| INSULIN 2 | 5'- TCT TCT ACA CAC CCA TGT CCC-3'         | 5'- GGT GCA GCA CTG ATC CAC-3           |
| GLP1R     | 5'- TGC CCA TTC TCT TTG CAA TC-3           | 5'- TTC GCG AGT CTG CAT TTG AT-3        |
| PC        | 5'- TTG AAG GAT GTG AAG GGC C-3'           | 5'- ACC TTT CCG ATA GTG CCC TC-3'       |
| PCSK1     | 5'- CAG GGG AGA CAA GGA AAA G-3            | 5'- AGG CAC TGC TGA TAG AGA TGG-3       |
| Catalase  | 5'- AGT CTC TCC ATC AGG TTA CTT TCT TGT-3' | 5'- AGC CAT TCA TGT GCC GAT GT-3        |
| PDX1      | 5'- GAC ACA TCA AAA TCT GGT TCC AAA-3      | 5'-TCC CGC TAC TAC GTT TCT TAT CTT C-3  |
| NeuroD    | 5'- ACT CCA AGA CCC AGA AAC TGT C-3        | 5'- ACT GGT AGG AGT AGG GAT GCA C-3     |
| MafB      | 5'-GAA GCC CGC GAG GCA TAT -3              | 5'-GGC CCT GGC ACT CAC AAA -3           |
| cMaf      | 5'-CAG AAC TGG CAA TGA ACA ATT CC-3        | 5'-TCC TTT TTC ACT TCA AAC TTC ATC AG-3 |
| Nkx2.2    | 5'-ATC TGG TTC CAA AAC CAT CG-3'           | 5'-TGTACTGGGCGTTGTATTGC-3'              |
| Glucagon  | 5'-GCC GAG CAA GGC GAG ACT-3'              | 5'-CAT GTC TGC GCC CAA GTT C-3'         |
| CaV 2.1   | 5'-CCC AAC GGG ACC AAA TGT C-3             | 5'-GGA TGT TCG AAC TGA GTG ATG-3'       |
| Kir 6.1   | 5'- CAT GGA GAA CGG TGT GGG-3'             | 5'-CAG ATA GGA GGT GCG GGC-3'           |
| GK        | 5'-AGC TCA GCG AAC CCC GGT CA-3'           | 5'- TCC CCG GAG TCG CTC TCC AC-3'       |
| Preproins | 5'-TCT ACC TGG TGT GTG GGG AG-3'           | 5'- CAC TGG TTA GCC TGA GAC CC-3'       |
| PDH-B     | 5'-GGT CTG CGG CGC TTC TGT GT-3            | 5'-AAG CCT GCC GCA AAG GTC CC-3         |
| ME        | 5'- TTA GCC CAC AGA CTC ATG GG-3'          | 5'-AGG ACT TTC TCA GCA GCA GG-3'        |
| MDH       | 5'- ACT CGT TCC CTG TCG TGA TC-3'          | 5'-TCA TGC GGA GGA GAG AAA C-3'         |
| G3PDH     | 5'-TGA GTT TCT GCA GCT GAT GA-3'           | 5'-TTG GAA CTC TAC GGT CCA AGT-3'       |
| GLUT2     | 5'-TGG GTT CCT TCC AGT TCG-3'              | 5'-AGG CGT CTG GTG TCG TAT G-3'         |
| Nkx 6.1   | 5'-TCT TCT GGC CTG GGG TGA TG-3'           | 5'-GGC TGC GTG CTT CTT TCT CCA-3        |
