# Supplementary material
Source: PubMed Central journal article supplement (PMC3047400)

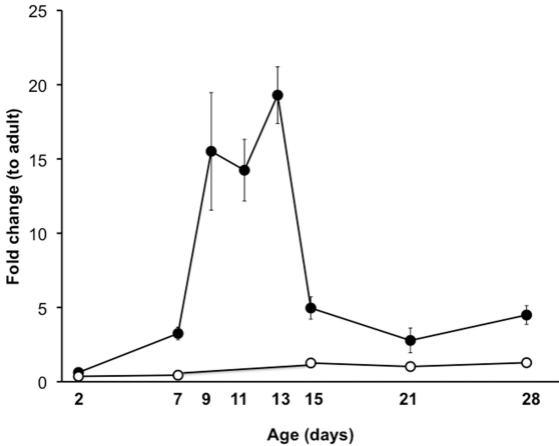

Supplement: NIHMS265336-supplement-c.pdf [file NIHMS265336-supplement-c.pdf]

MAFA/DAPI

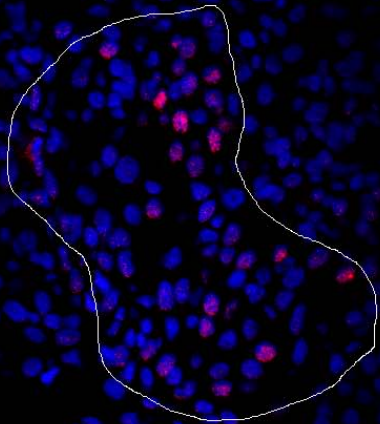

P2

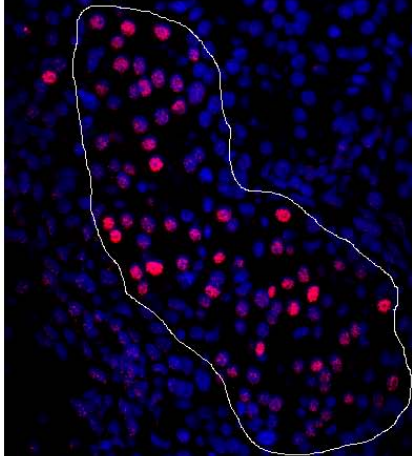

P11

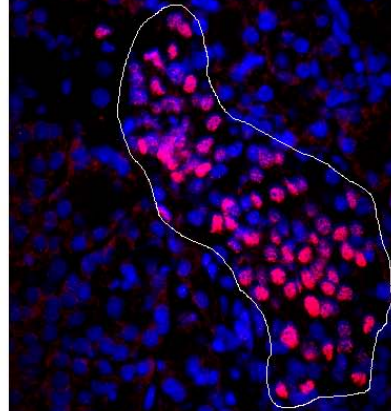

Adult

Supplement: NIHMS265336-supplement-d.pdf [file NIHMS265336-supplement-d.pdf]

P7

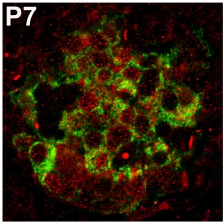

MAFA/Insulin

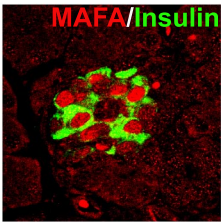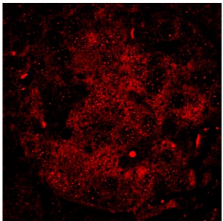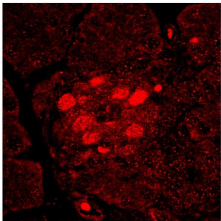

Supplement: NIHMS265336-supplement-e.pdf [file NIHMS265336-supplement-e.pdf]

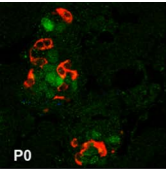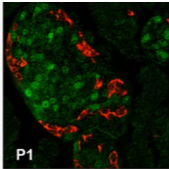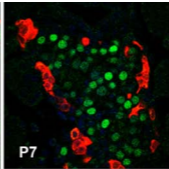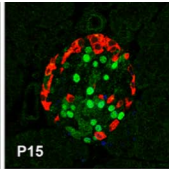

Supplement: NIHMS265336-supplement-f.pdf [file NIHMS265336-supplement-f.pdf]

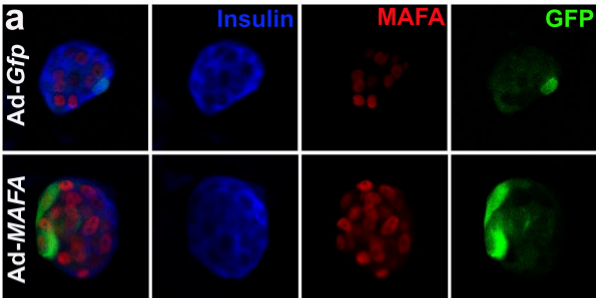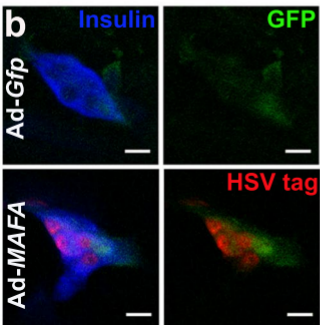

Supplement: NIHMS265336-supplement-g.pdf [file NIHMS265336-supplement-g.pdf]

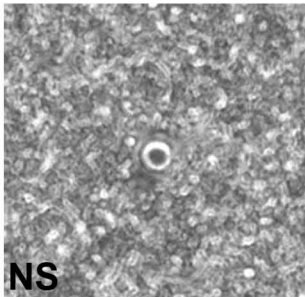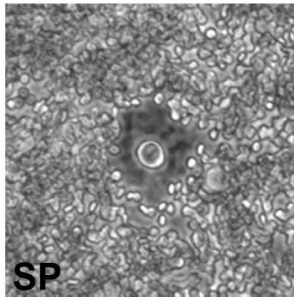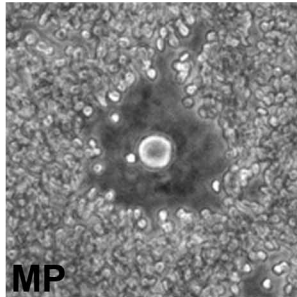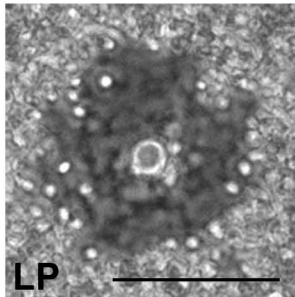

Supplement: NIHMS265336-supplement-h.pdf [file NIHMS265336-supplement-h.pdf]
